# Supplementary material for: Towards the endothermic dehydrogenation of nanoconfined magnesium borohydride ammoniate
Source: Royal Society of Chemistry journal article supplement (doi:10.1039/c5ta00697j), 2015-01-01
Supplement: c5ta00697j1.pdf [file c5ta00697j1.pdf]

### Supplementary Information:

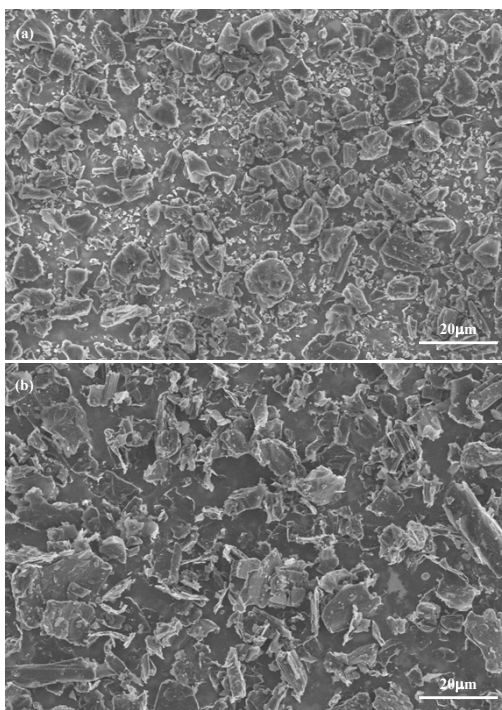

**Figure S1.** SEM images of the commercial activated carbon (a) and graphite (b).

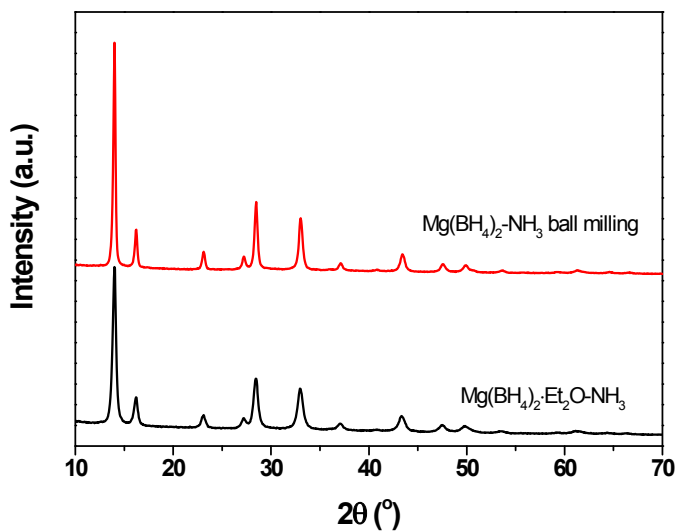

**Figure S2.** XRD patterns of Mg(BH<sub>4</sub>)<sub>2</sub>·6NH<sub>3</sub> synthesized through reacting Mg(BH<sub>4</sub>)<sub>2</sub>·2Et<sub>2</sub>O with NH<sub>3</sub> under magnetic stirring and ball milling Mg(BH<sub>4</sub>)<sub>2</sub> under NH<sub>3</sub> atmosphere, respectively.

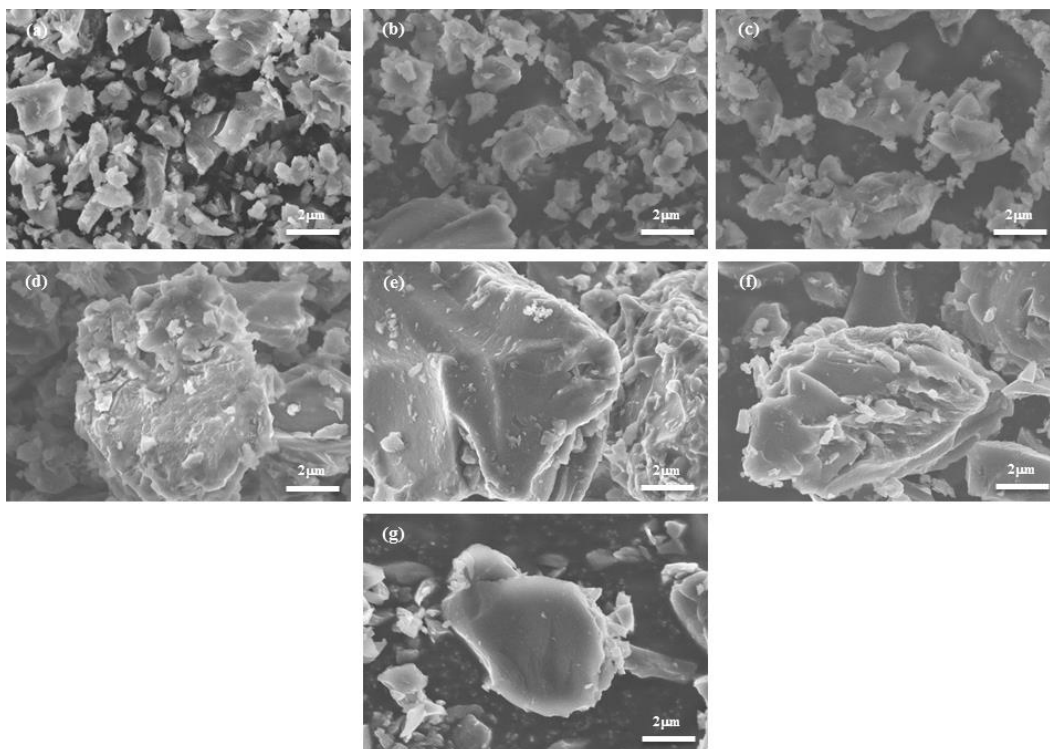

**Figure S3.** SEM images of the bulk  $\text{Mg}(\text{BH}_4)_2 \cdot 6\text{NH}_3$  (a), the  $\text{Mg}(\text{BH}_4)_2 \cdot 6\text{NH}_3@AC$  nanocomposites (b: 1:1, c: 0.8:1, d: 0.6:1, e: 0.4:1, f: 0.2:1) and AC (g).

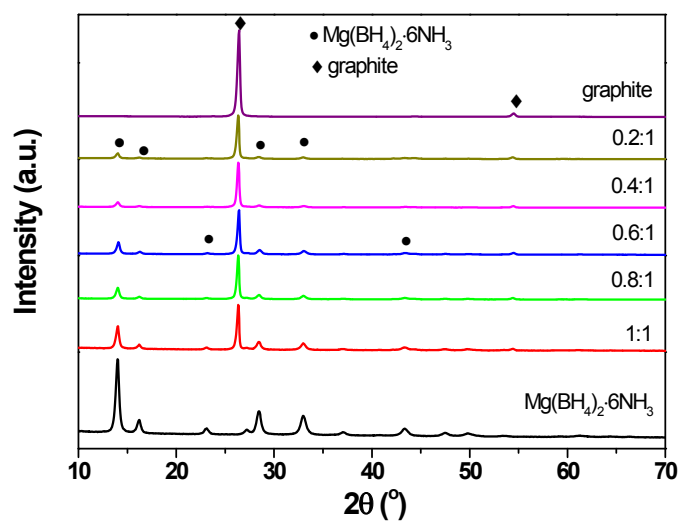

**Figure S4.** XRD patterns of the commercial graphite,  $\text{Mg}(\text{BH}_4)_2 \cdot 6\text{NH}_3$  and  $\text{Mg}(\text{BH}_4)_2 \cdot 6\text{NH}_3@graphite$  nanocomposites.

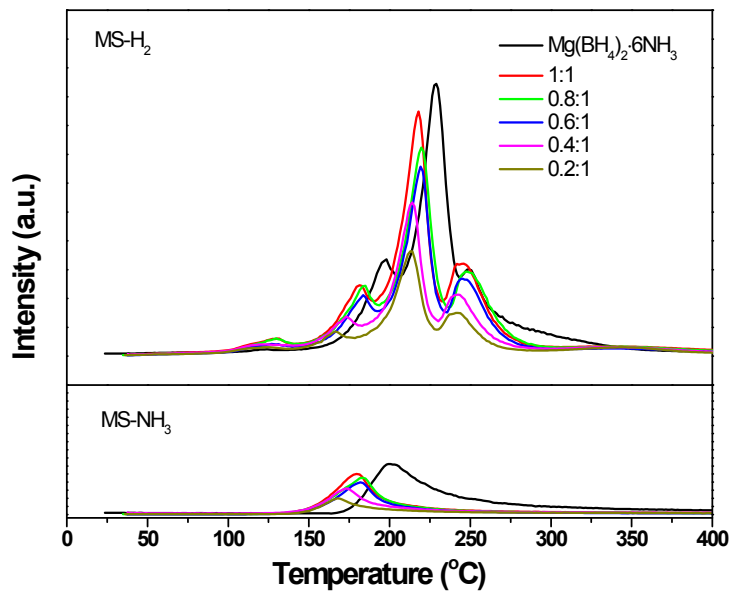

**Figure S5.** MS results of the bulk  $\text{Mg}(\text{BH}_4)_2 \cdot 6\text{NH}_3$  and  $\text{Mg}(\text{BH}_4)_2 \cdot 6\text{NH}_3 @ \text{AC}$  nanocomposites.

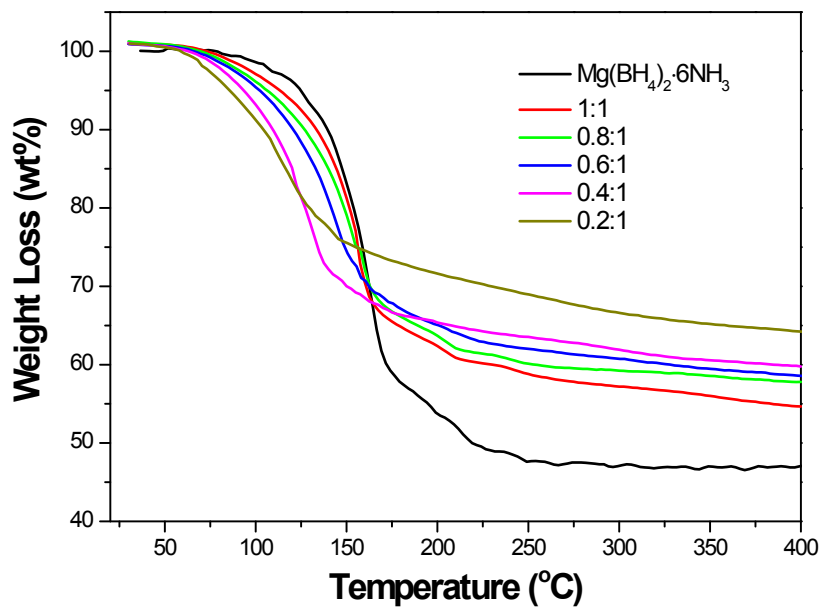

**Figure S6.** TG curves of the  $\text{Mg}(\text{BH}_4)_2 \cdot 6\text{NH}_3 @ \text{AC}$  nanocomposites and bulk  $\text{Mg}(\text{BH}_4)_2 \cdot 6\text{NH}_3$ .

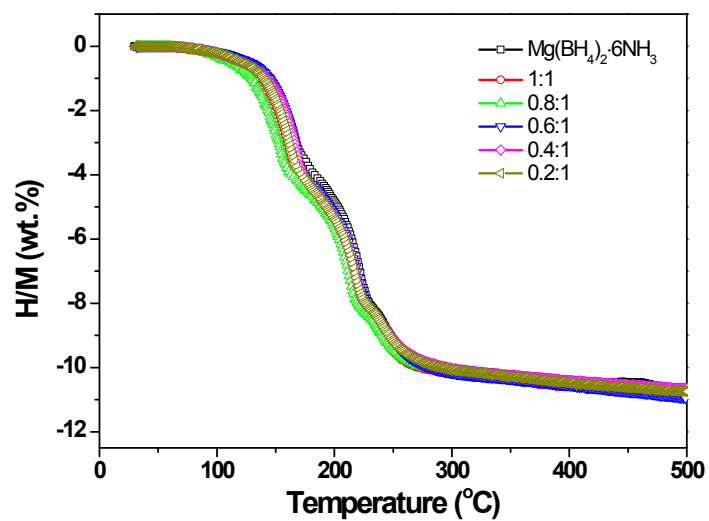

**Figure S7.** Volumetric release curves of the  $\text{Mg}(\text{BH}_4)_2 \cdot 6\text{NH}_3$ @graphite nanocomposites and bulk  $\text{Mg}(\text{BH}_4)_2 \cdot 6\text{NH}_3$ .

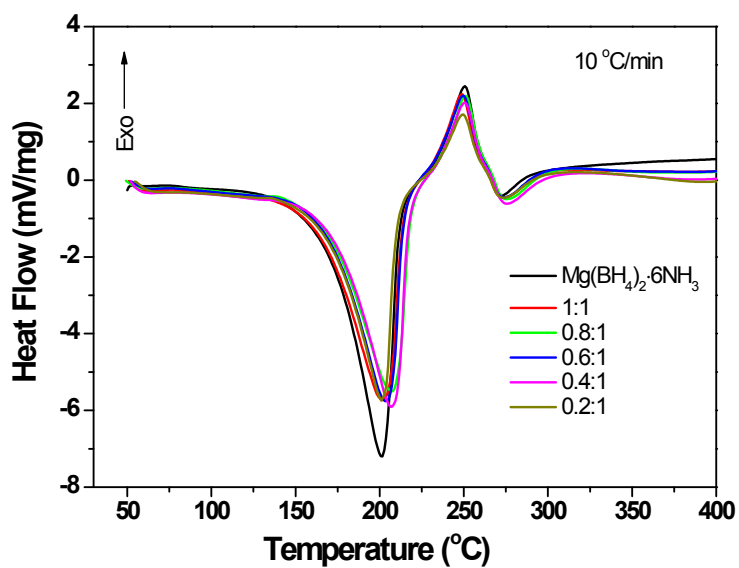

**Figure S8.** DSC curves of the bulk  $\text{Mg}(\text{BH}_4)_2 \cdot 6\text{NH}_3$  and  $\text{Mg}(\text{BH}_4)_2 \cdot 6\text{NH}_3$ @graphite composites.

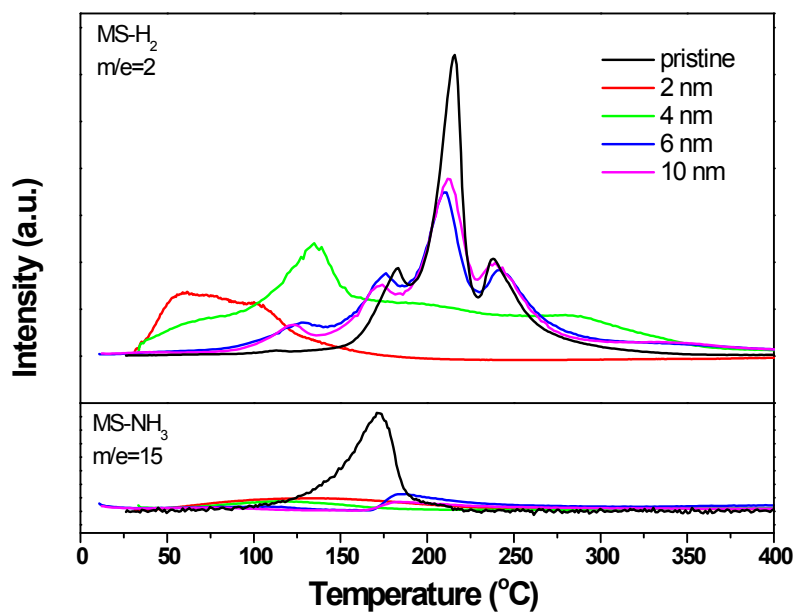

**Figure S9.** MS results of the  $\text{Mg}(\text{BH}_4)_2 \cdot 6\text{NH}_3 @ \text{AC}$  and  $\text{Mg}(\text{BH}_4)_2 \cdot 6\text{NH}_3 @ \text{PC}$  nanocomposites.

**Table S1.** Microstructural characteristics of activated carbon and porous carbons with different pore sizes

|                       | Surface area ( $S_{\text{BET}}$ , $\text{m}^2 \text{g}^{-1}$ ) | Total pore volume ( $\text{cm}^3 \text{g}^{-1}$ ) | Micropore volume ( $\text{cm}^3 \text{g}^{-1}$ ) | Micropore size (nm) | Particle Size ( $\mu\text{m}$ )                   |
|-----------------------|----------------------------------------------------------------|---------------------------------------------------|--------------------------------------------------|---------------------|---------------------------------------------------|
| Activated carbon      | 2051.00                                                        | 1.048                                             | 0.8353                                           | 2                   | $5 \pm 1$                                         |
| Porous carbon (4 nm)  | 1034.49                                                        | 1.301                                             | 0.426                                            | 4                   | 1 $\mu\text{m}$ in length and 500-600 nm in width |
| Porous carbon (6 nm)  | 222.305                                                        | 0.3022                                            | 0.093                                            | 6                   | 0.5                                               |
| Porous carbon (10 nm) | 105.257                                                        | 0.3992                                            | 0.050                                            | 10                  | $45 \pm 5$                                        |
